# Supplementary material
Source: PubMed Central journal article supplement (PMC4140987)
Supplement: NIHMS611219-supplement-Supp_TableS2.pdf [file NIHMS611219-supplement-Supp_TableS2.pdf]

**Table S2 - List of the 74 Ancestry Informative Markers (AIMs) used in the GGR1 targeted genotyping study.**

| Chromosome | SNP rs#    | Physical Position (hg19) | Allele 1 | Allele 2 |
|------------|------------|--------------------------|----------|----------|
| 1          | rs1335759  | 26,471,743               | C        | A        |
| 1          | rs2799541  | 92,355,115               | A        | G        |
| 1          | rs2802112  | 95,172,169               | T        | C        |
| 1          | rs2495392  | 151,677,249              | C        | T        |
| 1          | rs6656899  | 152,070,472              | G        | A        |
| 1          | rs11803257 | 204,688,365              | C        | T        |
| 1          | rs10779265 | 216,692,002              | T        | C        |
| 1          | rs10803002 | 242,090,414              | C        | T        |
| 1          | rs12760011 | 246,429,058              | G        | A        |
| 1          | rs10888287 | 248,117,416              | T        | G        |
| 2          | rs11687995 | 18,658,202               | G        | T        |
| 2          | rs4676060  | 109,662,043              | C        | T        |
| 2          | rs7570971  | 135,837,906              | C        | A        |
| 2          | rs4664935  | 159,072,395              | A        | G        |
| 2          | rs17745140 | 191,251,643              | T        | C        |
| 2          | rs2888479  | 218,139,904              | A        | G        |
| 3          | rs1521807  | 90,078,623               | T        | C        |
| 3          | rs9816441  | 189,633,491              | C        | A        |
| 4          | rs12186237 | 4,774,402                | A        | G        |
| 4          | rs1452373  | 82,284,055               | T        | C        |
| 4          | rs3796661  | 90,687,507               | T        | C        |
| 4          | rs843575   | 121,645,012              | G        | A        |
| 4          | rs692157   | 122,382,834              | T        | C        |
| 4          | rs10021417 | 150,766,245              | T        | G        |
| 4          | rs4692654  | 169,314,140              | G        | A        |
| 4          | rs1012342  | 175,681,427              | A        | C        |
| 5          | rs6596007  | 130,588,550              | C        | T        |
| 5          | rs6579750  | 148,997,686              | A        | G        |
| 5          | rs7734196  | 151,078,359              | C        | T        |
| 6          | rs1535001  | 34,927,280               | G        | A        |
| 6          | rs4713859  | 35,406,153               | C        | T        |
| 6          | rs7763017  | 144,556,125              | T        | C        |
| 7          | rs1378769  | 114,355,097              | G        | A        |
| 8          | rs983480   | 5,208,337                | C        | T        |
| 8          | rs2725661  | 5,516,604                | G        | A        |
| 8          | rs17056564 | 26,866,355               | A        | G        |
| 8          | rs4608108  | 48,515,523               | T        | G        |
| 8          | rs12234908 | 59,973,907               | G        | A        |
| 8          | rs425140   | 90,864,625               | A        | G        |
| 8          | rs2125984  | 106,107,997              | T        | G        |
| 9          | rs2812343  | 34,729,805               | A        | G        |
| 10         | rs10508372 | 8,972,018                | A        | G        |
| 10         | rs6602175  | 17,142,526               | G        | T        |
| 10         | rs11598854 | 20,897,903               | T        | C        |
| 10         | rs2485003  | 31,502,665               | A        | G        |
| 10         | rs2758982  | 78,065,708               | A        | G        |
| 10         | rs2275729  | 94,452,430               | G        | T        |
| 10         | rs1416410  | 109,148,770              | T        | C        |
| 11         | rs10831570 | 2,242,612                | A        | C        |
| 11         | rs7939568  | 8,442,054                | T        | C        |
| 11         | rs7950019  | 18,278,912               | G        | A        |
| 11         | rs10793162 | 76,127,861               | T        | G        |
| 11         | rs7936158  | 78,318,132               | G        | T        |
| 11         | rs10741436 | 91,870,558               | C        | T        |
| 11         | rs11222971 | 132,070,057              | C        | A        |
| 12         | rs735295   | 547,683                  | C        | T        |

**Table S2 - List of the 74 Ancestry Informative Markers (AIMs) used in the GGRI targeted genotyping study.**

| <b>Chromosome</b> | <b>SNP rs#</b> | <b>Physical<br/>Position (hg19)</b> | <b>Allele 1</b> | <b>Allele 2</b> |
|-------------------|----------------|-------------------------------------|-----------------|-----------------|
| 12                | rs7174         | 121,017,171                         | A               | G               |
| 13                | rs9555880      | 90,037,467                          | C               | T               |
| 14                | rs9743878      | 32,267,323                          | C               | T               |
| 14                | rs1021484      | 43,864,350                          | G               | C               |
| 15                | rs12913832     | 28,365,618                          | A               | G               |
| 15                | rs12438591     | 29,866,274                          | A               | G               |
| 15                | rs8031866      | 57,445,040                          | A               | G               |
| 15                | rs474875       | 59,086,703                          | G               | T               |
| 15                | rs4357909      | 84,515,575                          | G               | A               |
| 16                | rs837698       | 10,112,259                          | A               | C               |
| 16                | rs9935655      | 20,342,897                          | A               | G               |
| 17                | rs11078115     | 12,942,466                          | T               | C               |
| 17                | rs12950752     | 73,344,079                          | A               | G               |
| 18                | rs17796359     | 27,981,638                          | A               | G               |
| 18                | rs17058548     | 73,635,447                          | C               | A               |
| 19                | rs10401746     | 39,320,960                          | T               | C               |
| 21                | rs7275593      | 19,522,846                          | C               | T               |
| 21                | rs2825006      | 20,075,947                          | C               | T               |
